# Supplementary material for: Few constraints limit the design of quinone methide-oligonucleotide self-adducts for directing DNA alkylation
Source: Royal Society of Chemistry journal article supplement (doi:10.1039/c0cc03317k), 2010-11-18
Supplement: c0cc03317k.pdf [file c0cc03317k.pdf]

## Few Constraints Limit the Design of Quinone Methide-Oligonucleotide Self-Adducts for Directing DNA Alkylation

Clifford S. Rossiter,<sup>a,b</sup> Emilia Modica,<sup>a</sup> Dalip Kumar,<sup>a,c</sup> and Steven E. Rokita<sup>a</sup>

<sup>a</sup>Department of Chemistry and Biochemistry, University of Maryland, College Park, MD 20742, USA. E-mail: [rokita@umd.edu](mailto:rokita@umd.edu); Fax: +1 301-405-9376; Tel: +1 301-405-1816. <sup>b</sup>Current Address: Department of Chemistry, The State University of New York at Potsdam, 44 Pierrepont Avenue, Potsdam NY 13676. <sup>c</sup>Current Address: Department of Chemistry, Birla Institute of Technology and Science, Pilani, Rajasthan 333 031 INDIA.

**Materials.** Oligonucleotides and their 5'-hexamethyl aminolinker derivatives were obtained from IDT (Coralville, Iowa) and radiolabeled as indicated under standard conditions with [ $\gamma$ -<sup>32</sup>P]ATP and T4 polynucleotide kinase. Oligonucleotide conjugates were synthesized by coupling N-hydroxysuccinimidyl esters of the quinone methide precursor (QMP, 3-(4'-t-butyldimethylsilyloxy-3'-acetoxymethyl-phenyl)propionate) and diphenyl acetate ( $\phi_2$ ) alternatively to oligonucleotides containing a 5'-aminolinker as described previously.<sup>1</sup> Each conjugate was purified by C-18 reverse phase HPLC using triethylammonium acetate 50 mM pH 5 and a gradient of 10-55% CH<sub>3</sub>CN over 30 min (1 mL/min). Products were desalted using ZipTips and then characterized by either electrospray ionization (1 M ammonium formate:methanol, 1:1) or MALDI-TOF (2',4',6'-trihydroxyacetophenone: citric acid dibasic ammonium salt 1:1 as the matrix) mass spectroscopy (see Tables S1 and S2).

**Thermal studies of  $\Omega$ 2-GGG.** The hairpin-forming  $\Omega$ 2-GGG (1.4 - 5.9  $\mu$ M) was pre-incubated for 15 min at 40 °C in 100 mM sodium phosphate pH 7, 100 mM NaCl, and 100 mM KF prior to analysis. After this pre-incubation, the temperature was reduced from 40 to 15 °C in steps of 1 °C lasting for 1 min each. Temperature was then increased from 15 °C to 90 °C at the same rate. The  $\Delta A_{260}$  vs. temperature was monitored for duplicate sets of three samples each with a Varian Cary 100 Bio UV-Vis spectrophotometer, and the melting temperature was calculated using the software of this instrument.

**General procedure for deprotection of oligonucleotide quinone methide precursor (QMP) conjugates and subsequent formation of their self-adducts.**<sup>1</sup> Reaction was initiated by adding 0.1 - 1 M KF to the oligonucleotide conjugates (2.2  $\mu$ M) in 25 - 100 mM MES pH 7. Incubation was maintained under ambient conditions and monitored by analytical C-18 reverse phase HPLC using triethylammonium acetate 50 mM pH 5 and a gradient of 10-55% CH<sub>3</sub>CN over 30 min (1 mL/min). Samples were isolated from chromatography for mass spectroscopy (Table S1), but crude reaction mixtures were used without purification for subsequent alkylation of target oligonucleotides.

**General procedure for target alkylation by quinone methide (QM) oligonucleotide self-adducts.**<sup>1</sup> The self-adducts generated as described above were diluted to 1.1  $\mu$ M by addition of a 5'-diphenylacetylated target strand for HPLC analysis equivalent to that described above. Alternatively, self-adducts were diluted equivalently with a 5'-[<sup>32</sup>P]-labeled target strand (1.0  $\mu$ M) in 100 mM MES pH 7 for analysis by denaturing 20 % (7 M urea) polyacrylamide gel electrophoresis. Product yields were estimated by the conversion (%) of target strand to its alkylated derivative using  $A_{260}$  for HPLC studies and phosphorimager for gel studies.

---

### References

1. Q. Zhou, S. E. Rokita *Proc. Natl. Acad. Sci. (USA)* **2003**, *100*, 15452-15457.

**Table S1.** Deprotection of DNA Conjugates and Subsequent Formation of Their Self-Adducts.

| quinone methide DNA conjugate                 | ESI-MS ( $M-3H^+$ ) <sup>3-</sup> |                   |                          |        |
|-----------------------------------------------|-----------------------------------|-------------------|--------------------------|--------|
|                                               | loss of TBDMS                     |                   | self-adduct of conjugate |        |
|                                               | calc                              | obs               | calc                     | obs    |
| 5'-QMP-d(ACG TCA GGT GGC ACT), <b>QMP-OD1</b> | 1663 <sup>a</sup>                 | 1663 <sup>a</sup> | 1663.4                   | 1663.1 |
| 5'-QMP-d(TCG TCT GGT GGC TCT), <b>QMP-OD2</b> | 1654.0                            | 1653.8            | 1634.0                   | 1633.7 |
| 5'-QMP-d(ATG TTA GGT GGT ATT), <b>QMP-OD3</b> | 1683.0                            | 1682.9            | 1663.0                   | 1662.9 |
| 5'-QMP-d(ACT TCA TTT TTC ACT), <b>QMP-OD4</b> | 1621.3                            | 1620.9            | 1601.3                   | 1601.1 |

<sup>a</sup>Q. Zhou, S. E. Rokita *Proc. Natl. Acad. Sci. (USA)* **2003**, *100*, 15452-15457.

**Table S2.** Characterization of Oligonucleotide Conjugates by Mass Spectroscopy.

| quinone methide DNA conjugate                               | ESI-MS ( $M+Na^+-6H^+$ ) <sup>5-</sup> |           |
|-------------------------------------------------------------|----------------------------------------|-----------|
|                                                             | calc (m/z)                             | obs (m/z) |
| 5'-QMP-d(CGCTCTCCTCCTCCACCTCCGAGCGCAG ) <b>QMP-Ω1-CAG</b>   | 1783.2                                 | 1784.4    |
| quinone methide DNA conjugate                               | MALDI-TOF MS (m/z)                     |           |
|                                                             | calc (m/z)                             | obs (m/z) |
| 5'-QMP-d(ACGCTCTCCTCCTCCACCTCCGAGCGTAAA) <b>QMP-Ω2-AAA</b>  | 9522.2                                 | 9521.4    |
| 5'-QMP-d(ACGCTCTCCTCCTCCACCTCCGAGCGTCCC ) <b>QMP-Ω2-CCC</b> | 9451.2                                 | 9450.5    |
| 5'-QMP-d(ACGCTCTCCTCCTCCACCTCCGAGCGT) <b>QMP-Ω2</b>         | 8582.6                                 | 8583.3    |
| 5'-QMP-d(ACGCTCTCCTCCTCCACCTCC ) <b>QMP-OD5</b>             | 6688.4                                 | 6687.5    |

**Figure S1.** Reverse-phase (C-18) chromatography monitors deprotection of a quinone methide precursor (QMP)-oligonucleotide conjugate, its conversion to a quinone methide (QM) self-adduct and ultimate alkylation of a complementary target. KF (1 M) was added to 5'-QMP-d(TCGTCTGGTGGCTCT) (**QMP-OD2**, 2.2 μM) in 100 mM MES pH 7 to initiate reaction, and the resulting solution was incubated under ambient conditions. Aliquots were removed over time and analyzed by HPLC. Chromatograms after (A) 4 h and (B) 24 h incubations are provided as examples. An equal volume of the complementary target 3'-d(GAATCAGCAGACCACCGAGA)-φ<sub>2</sub> (**OD2c**, 2.0 μM in 100 MES pH 7) modified at its 5'-aminolinker with diphenylacetate to aid chromatographic resolution was then added. The solution was incubated under ambient conditions, and aliquots were removed over time for HPLC analysis and *meta*-cresol was added as a chromatographic standard. (C) The chromatogram after 5 days is provided as an example.

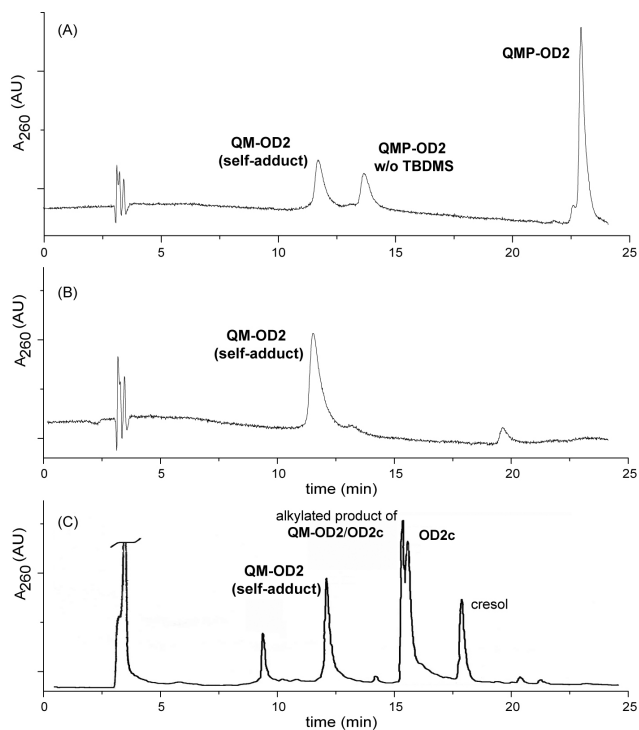

**Figure S2.** Reverse-phase (C-18) chromatography monitors deprotection of a quinone methide precursor (QMP)-oligo-nucleotide conjugate and its conversion to a quinone methide (QM) self-adduct. KF (1 M) was added to 5'-QMP-d(ATGTT AGGTGGTATT) (**QMP-OD3**, 2.2  $\mu$ M) in 100 mM MES pH 7 to initiate reaction, and the resulting solution was incubated under ambient conditions. Aliquots were removed over time and analyzed by HPLC. Chromatograms after 4 and 24 h incubations are provided as examples.

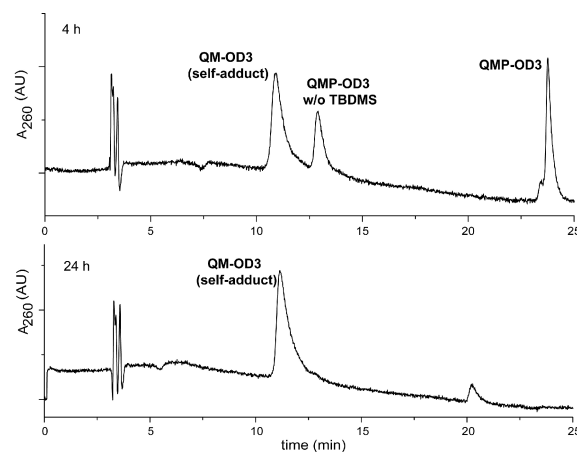

**Figure S3.** Reverse-phase (C-18) chromatography monitors target alkylation by a complementary quinone methide (QM)-oligo-nucleotide self-adduct. The self-adduct of **QMP-OD3** (2.2  $\mu$ M) was generated as described above and combined with an equal volume of its complementary target 3'-d(GAATCTACAATCC ACCATAA)- $\phi_2$  (**OD3c**, 2.0  $\mu$ M in 100 MES pH 7) modified at its 5'-aminolinker with diphenylacetate to aid chromatographic resolution. The solution was incubated under ambient conditions, and aliquots were removed over time (0 - 7 days) for HPLC analysis as described above. *meta*-Cresol was added as a chromatographic standard. Chromatograms after 0 and 7 days of **OD3c** alkylation are provided as examples.

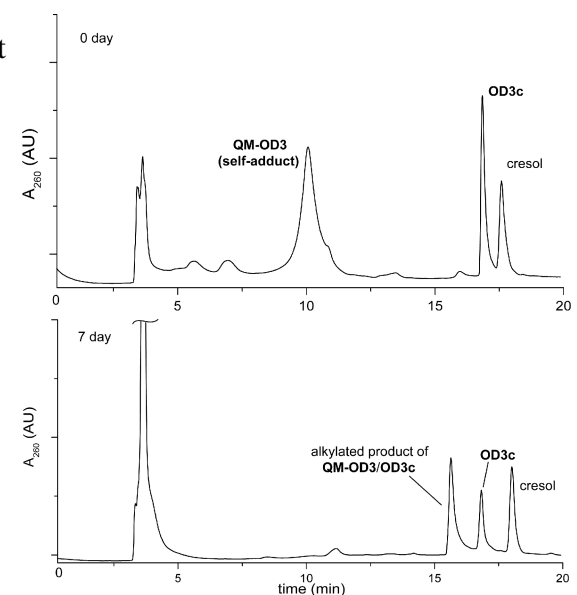

**Figure S4.** Reverse-phase (C-18) chromatography monitors deprotection of a quinone methide precursor (QMP)-oligo-nucleotide conjugate, its conversion to a quinone methide (QM) self-adduct and ultimate alkylation of a complementary target. KF (1 M) was added to 5'-QMP-d(AC~~TT~~CA~~TTTT~~TC ACT) (**QMP-OD4**, 2.2  $\mu$ M) in 100 mM MES pH 7 to initiate reaction, and the resulting solution was incubated under ambient conditions for 24 h. Aliquots were removed over time and analyzed by HPLC. The chromatogram after (A) 6 h incubation is provided as an example. An equal volume of its complementary target 3'-d(GAATCTG~~A~~AGT~~AAAA~~GTGA)- $\phi_2$  (**OD4c**, 2.0  $\mu$ M in 100 MES pH 7) modified at its 5'-amino-linker with diphenylacetate to aid chromatographic resolution was subsequently added. This final solution was incubated under ambient conditions, and aliquots were removed over time for HPLC analysis and *meta*-cresol was added as a chromatographic standard. (B) The chromatogram after 10 days is provided as an example.

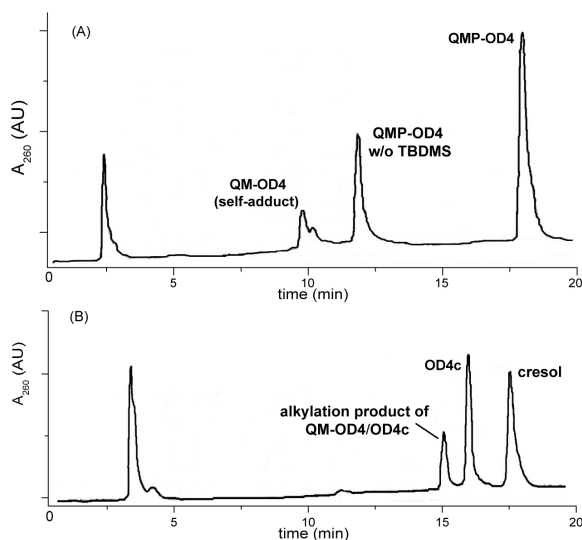

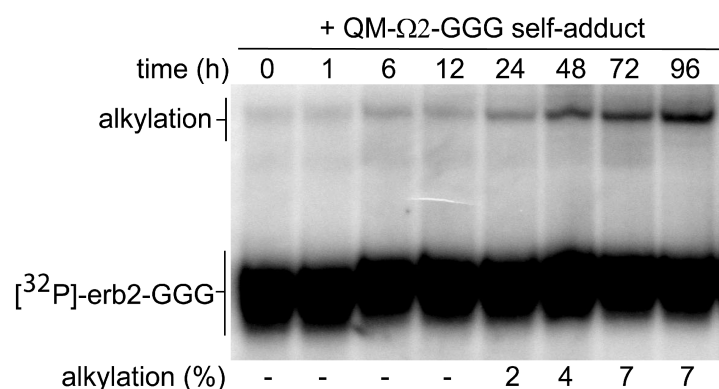

**Figure S5.** Time dependent alkylation of target DNA with a hairpin-forming self-adduct containing a 3'-GGG extension. The quinone methide (QM) self-adduct of 5'-QMP-d(ACGCTCTCCTCCTCCACCTCCGAGC GTGGG) (**QMP-Ω2-GGG**, 1.1 μM) in 100 mM MES pH 7 was generated *in situ* by addition of 100 mM KF and incubation under ambient conditions for 24 h. The target strand 5'-[<sup>32</sup>P]-d(AGGAGGAGGTGGAG GAGGAGAGCGTGGG) ([<sup>32</sup>P]-**erb2-GGG**, 1.0 μM, 90 nCi) was then added at 0 h and incubated under ambient conditions. At the indicated times, samples were analyzed by denaturing 20 % (7 M urea) polyacrylamide gel electrophoresis. Product yields were estimated by the conversion (%) of target strand to its alkylated derivative using phosphoimager and ImageQuant software.

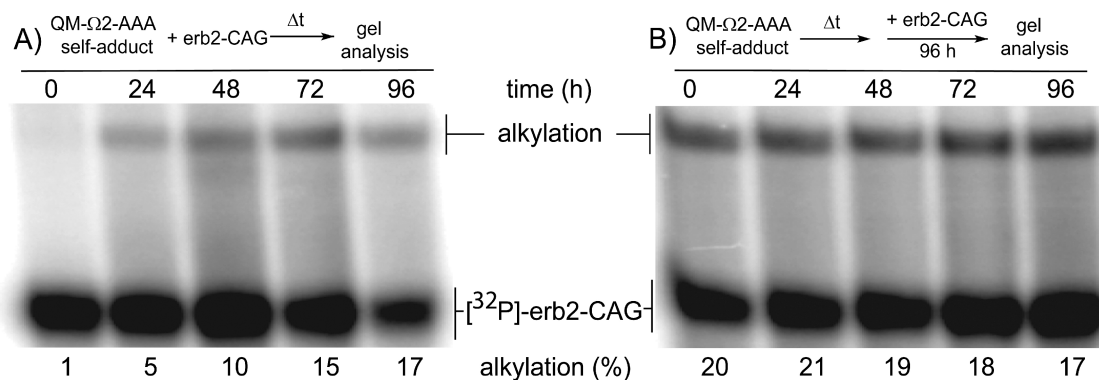

**Figure S6.** Efficiency and longevity of a hairpin-forming self-adduct containing a 3'-AAA extension for alkylation of target DNA. The quinone methide (QM) self-adduct of 5'-QMP-d(ACGCTCTCCTCCTCC ACCTCCGAGCGTAAA) (**QMP-Ω2-AAA**, 1.1 μM) in 100 mM MES, 100 mM NaCl pH 7 was generated *in situ* by addition of 100 mM KF. (A) To assess the efficiency of target alkylation, incubation was maintained under ambient conditions for 24 h to form the self-adduct. The target strand 5'-[<sup>32</sup>P]-d(AGGAGGAGGTGG AGGAGGAGAGCGTCAG) ([<sup>32</sup>P]-**erb2-CAG**, 1.0 μM, 90 nCi) was then added at 0 h and incubated under ambient conditions for the indicated times. (B) To assess the stability of the QM adduct for subsequent alkylation, samples were pre-incubated after KF addition for the indicated times before [<sup>32</sup>P]-**erb2-CAG** (1.0 μM, 90 nCi) was added. These samples were then incubated for an additional 96 h. All reactions were analyzed by denaturing 20 % (7 M urea) polyacrylamide gel electrophoresis. Product yields were estimated by the conversion (%) of target strand to its alkylated derivative using phosphoimager and ImageQuant software.

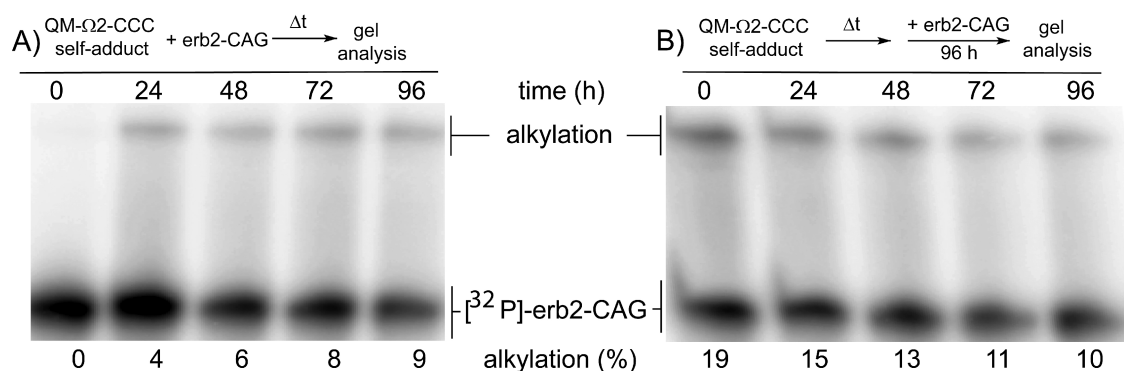

**Figure S7.** Efficiency and longevity of a hairpin-forming self-adduct containing a 3'-CCC extension for alkylation of target DNA. The quinone methide (QM) self-adduct of 5'-QMP-d(ACGCTCTCCTCCTCC ACCTCCGAGCGTCCC) (**QMP-Ω2-CCC**, 1.1 μM) in 100 mM MES, 100 mM NaCl pH 7 was generated *in situ* by addition of 100 mM KF. (A) To assess the efficiency of target alkylation, incubation was maintained under ambient conditions for 24 h to form the self-adduct. The target strand [<sup>32</sup>P]-**erb2-CAG** (1.0 μM, 90 nCi) was then added at 0 h and incubation was continued for the indicated times under ambient conditions. (B) To assess the stability of the QM adduct for subsequent alkylation, samples were pre-incubated after KF addition for the indicated times before [<sup>32</sup>P]-**erb2-CAG** (1.0 μM, 90 nCi) was added. These samples were then incubated for an additional 96 h. All reactions were analyzed by denaturing 20 % (7 M urea) polyacrylamide gel electrophoresis. Product yields were estimated by the conversion (%) of target strand to its alkylated derivative using phosphoimager and ImageQuant software.

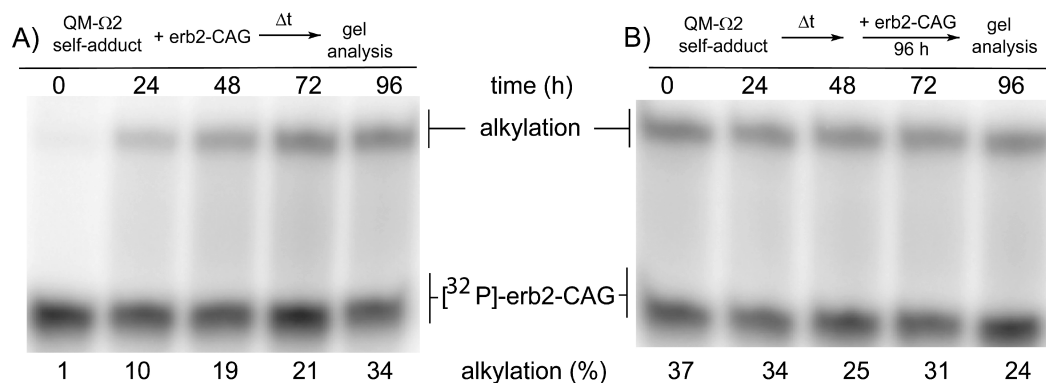

**Figure S8.** Efficiency and longevity of a hairpin-forming self-adduct lacking a 3'-extension for alkylation of target DNA. The quinone methide (QM) self-adduct of 5'-QMP-d(ACGCTCTCCTCCTCCACCTCCG AGCGT) (**QMP-Ω2**, 1.1 μM) in 100 mM MES, 100 mM NaCl pH 7 was generated *in situ* by addition of 100 mM KF. (A) To assess the efficiency of target alkylation, incubation was maintained under ambient conditions for 24 h to form the self-adduct. The target strand [<sup>32</sup>P]-**erb2-CAG** (1.0 μM, 90 nCi) was then added at 0 h and incubation was continued for the indicated times under ambient conditions. (B) To assess the stability of the QM adduct for subsequent alkylation, samples were pre-incubated after KF addition for the indicated times before [<sup>32</sup>P]-**erb2-CAG** (1.0 μM, 90 nCi) was added. These samples were then incubated for an additional 96 h. All reactions were analyzed by denaturing 20 % (7 M urea) polyacrylamide gel electrophoresis. Product yields were estimated by the conversion (%) of target strand to its alkylated derivative using phosphoimager and ImageQuant software.

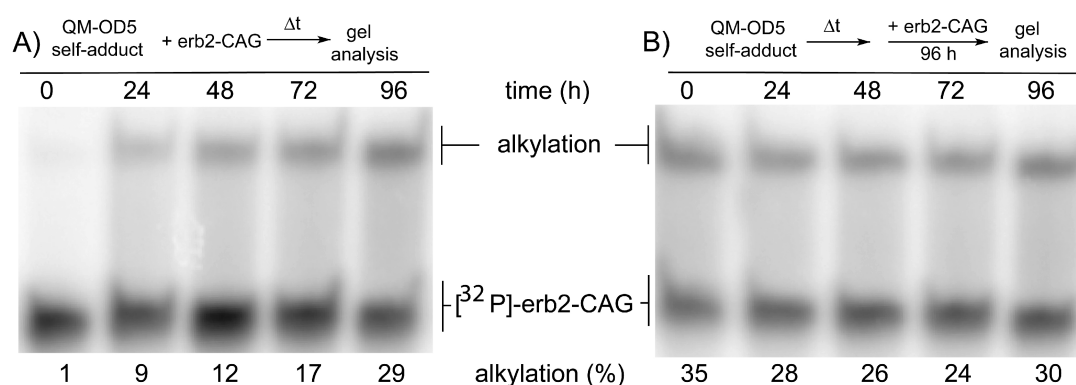

**Figure S9.** Efficiency and longevity of a self-adduct lacking a hairpin structure prior to alkylation of target DNA. The quinone methide (QM) self-adduct of 5'-QMP-d(ACGCTCTCCTCCTCCACCTCC) (**QMP-OD5**, 1.1  $\mu$ M) in 100 mM MES, 100 mM NaCl pH 7 was generated *in situ* by addition of 100 mM KF. (A) To assess the efficiency of target alkylation, incubation was maintained under ambient conditions for 24 h to form the self-adduct. The target strand [ $^{32}$ P]-**erb2-CAG** (1.0  $\mu$ M, 90 nCi) was then added at 0 h and incubation was continued for the indicated times under ambient conditions. (B) To assess the stability of the QM adduct for subsequent alkylation, samples were pre-incubated after KF addition for the indicated times before [ $^{32}$ P]-**erb2-CAG** (1.0  $\mu$ M, 90 nCi) was added. These samples were then incubated for an additional 96 h. All reactions were analyzed by denaturing 20 % (7 M urea) polyacrylamide gel electrophoresis. Product yields were estimated by the conversion (%) of target strand to its alkylated derivative using phosphoimager and ImageQuant software.

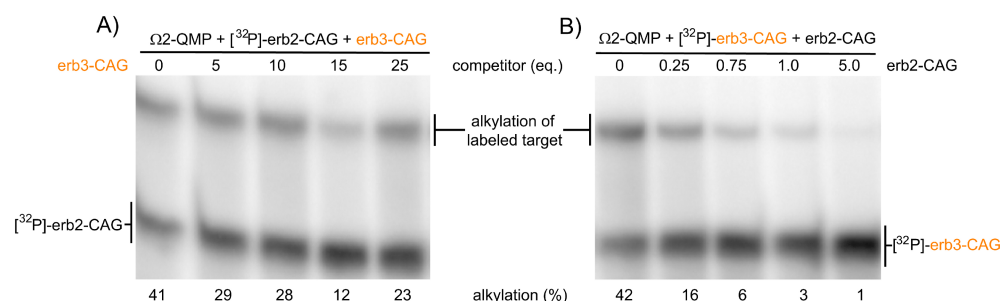

**Figure S10.** Competition between matched and mismatched targets for alkylation by the hairpin forming conjugate containing a quinone methide precursor. (A) Alkylation of a fully complementary target [ $^{32}$ P]-**erb2-CAG** (1.0  $\mu$ M) by the conjugate **QMP-Ω2** (1.1  $\mu$ M) in 100 mM MES, 100 mM NaCl pH 7 was initiated by addition of 100 mM KF in the presence of the indicated equivalents of an alternative target containing 3 mispaired nucleotides in the center of the duplex, 5'-d(AGGAGGAGGTGG**CAA**AGGAGAGCGTCAG) (**erb3-CAG**). (B) Alkylation of the mismatched target [ $^{32}$ P]-**erb3-CAG** (1.0  $\mu$ M) by the conjugate **QMP-Ω2** (1.1  $\mu$ M) in 100 mM MES, 100 mM NaCl pH 7 was initiated by addition of 100 mM KF in the presence of the indicated equivalents of the fully complementary alternative target **erb2-CAG**. All samples were incubated under ambient conditions for 96 h and then analyzed by denaturing 20% (7 M urea) polyacrylamide gel electrophoresis as described above.

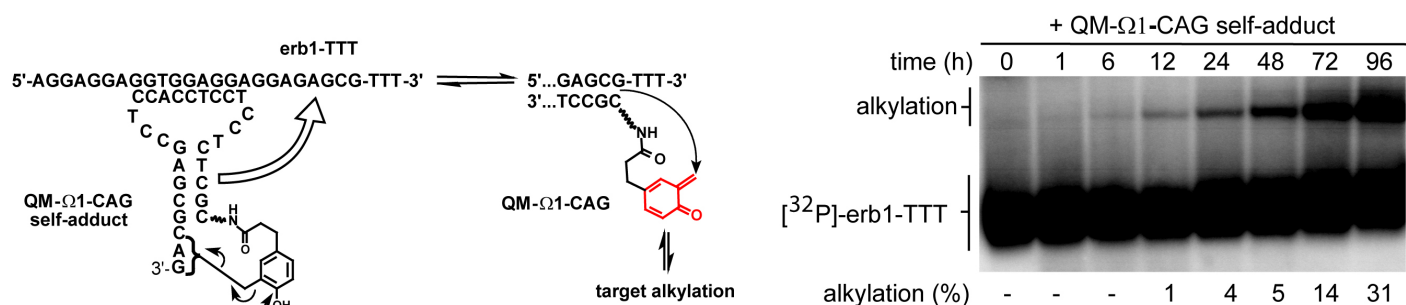

**Figure S11.** Time dependent alkylation of target DNA containing a 3'-TTT extension. The quinone methide (QM) self-adduct of 5'-QMP-d(CGCTCTCCTCCTCCACCTCCGAGCGTCAG) (**QMP-Ω1-CAG**, 1.1 μM) in 100 mM MES pH 7 was generated *in situ* by addition of 100 mM KF and incubation under ambient conditions for 24 h. The target strand 5'-[<sup>32</sup>P]-d(AGGAGGAGGTGGAGGAGGAGAGCGTTT) ([<sup>32</sup>P]-**erb1-TTT**, 1.0 μM, 90 nCi) was then added at 0 h and incubated under ambient conditions. At the indicated times, samples were analyzed by denaturing 20 % (7 M urea) polyacrylamide gel electrophoresis. Product yields were estimated by the conversion (%) of target strand to its alkylated derivative using phosphoimager and ImageQuant software.

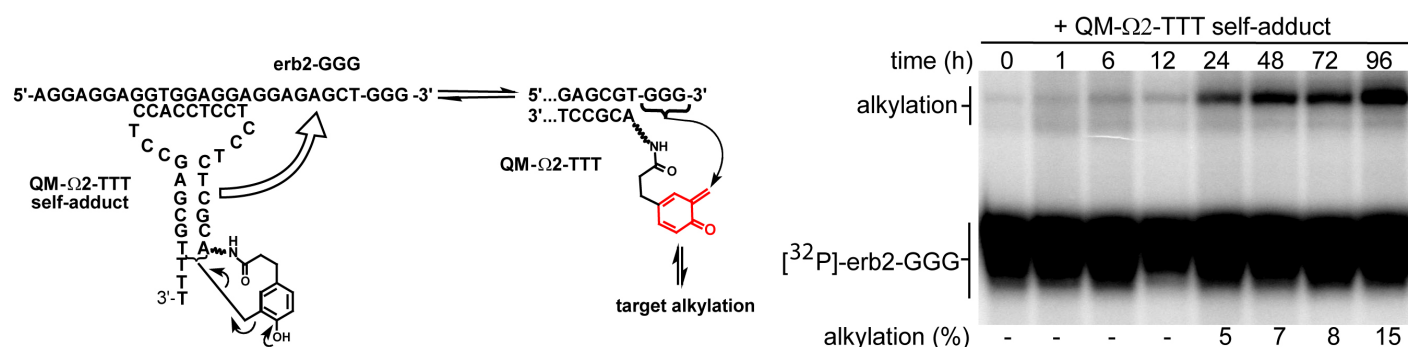

**Figure S12.** Time dependent alkylation of target DNA with a hairpin-forming self-adduct containing a 3'-TTT extension. The quinone methide (QM) self-adduct of 5'-QMP-d(ACGCTCTCCTCCTCCACCTCCGAGCGTTTT) (**QMP-Ω2-TTT**, 1.1 μM) in 100 mM MES pH 7 was generated *in situ* by addition of 100 mM KF and incubation under ambient conditions for 24 h. The target strand 5'-[<sup>32</sup>P]-d(AGGAGGAGGTGGAGGAGGAGAGCGTGGG) ([<sup>32</sup>P]-**erb2-GGG**, 1.0 μM, 90 nCi) was then added at 0 h and incubated under ambient conditions. At the indicated times, samples were analyzed by denaturing 20 % (7 M urea) polyacrylamide gel electrophoresis. Product yields were estimated by the conversion (%) of target strand to its alkylated derivative using phosphoimager and ImageQuant software.
